# Supplementary material for: Nutrigenetic Interaction of Spontaneously Hypertensive Rat Chromosome 20 Segment and High-Sucrose Diet Sensitizes to Metabolic Syndrome
Source: MDPI journal article supplement (doi:10.3390/nu14163428), 2022-08-20
Supplement: s1 [file s1]

**Supplementary table S1.** Two-way ANOVA results (p-values) for STRAIN and DIET as major factors and their interaction.

| <b>Trait</b>                    | <b>STRAIN</b>   | <b>DIET</b>    | <b>STRAIN*DIET INTERACTION</b> |
|---------------------------------|-----------------|----------------|--------------------------------|
| Body weight                     | 0.119           | <b>0.006</b>   | 0.31                           |
| Liver weight/100g               | 0.60            | 0.053          | 0.34                           |
| Heart weight/100g               | 0.63            | <b>0.027</b>   | 0.09                           |
| Kidney weight                   | 0.43            | <b>9.5E-05</b> | <b>0.007</b>                   |
| Epididymal fat weight/100g      | <b>0.0018</b>   | <b>5.2E-06</b> | <b>0.015</b>                   |
| Retroperitoneal fat weight/100g | 0.27            | 0.06           | <b>0.027</b>                   |
| Triacylglycerols                | <b>0.0006</b>   | 0.28           | <b>0.0008</b>                  |
| Cholesterol                     | <b>4.8E-13</b>  | <b>0.0015</b>  | <b>0.013</b>                   |
| Glucose – 0 min                 | <b>7.4E-06</b>  | 0.59           | 0.83                           |
| Glucose – 30 min                | <b>0.0003</b>   | 0.49           | 0.46                           |
| Glucose – 60 min                | <b>0.0001</b>   | 0.23           | 0.29                           |
| Glucose – 120 min               | <b>9.2E-09</b>  | 0.43           | <b>0.021</b>                   |
| Glucose – 180 min               | <b>2.2E-05</b>  | 0.42           | 0.30                           |
| AUC (OGTT)                      | <b>0.040</b>    | 0.49           | 0.21                           |
| Insulin                         | 0.39            | 0.60           | 0.98                           |
| Free fatty acids                | <b>5.15E-12</b> | 0.058          | <b>0.027</b>                   |

Significant values are indicated in **bold**. AUC (OGTT)...area under the glycemic curve of the oral glucose tolerance test.
