# Supplementary material for: Nutrigenetic Interaction of Spontaneously Hypertensive Rat Chromosome 20 Segment and High-Sucrose Diet Sensitizes to Metabolic Syndrome
Source: MDPI journal article supplement (doi:10.3390/nu14163428), 2022-08-20
Supplement: s1 [file s1]

| Position on RNO 20 (bp) | Gene Symbol    | Reference (BN) allele | SHR variant (BN.SHR20) | Reference Amino Acid | Variant Amino Acid |
|-------------------------|----------------|-----------------------|------------------------|----------------------|--------------------|
| 3077762                 | <i>Vars2</i>   | T                     | A                      | Ser                  | Thr                |
| 3691116                 | <i>Apom</i>    | T                     | C                      | Met                  | Thr                |
| 4173424                 | <i>Notch4</i>  | A                     | G                      | Val                  | Ala                |
| 4270058                 | <i>Btnl8</i>   | T                     | A                      | Ile                  | Asn                |
| 4304918                 | <i>Btnl7</i>   | C                     | G                      | His                  | Gln                |
| 4308932                 | <i>Btnl7</i>   | T                     | C                      | Trp                  | Arg                |
| 4366798                 | <i>Btnl5</i>   | C                     | G                      | Pro                  | Ala                |
| 4366804                 | <i>Btnl5</i>   | G                     | C                      | Val                  | Leu                |
| 4366907                 | <i>Btnl5</i>   | G                     | A                      | Ala                  | Thr                |
| 4366948                 | <i>Btnl5</i>   | G                     | T                      | Glu                  | Asp                |
| 4366959                 | <i>Btnl5</i>   | C                     | G                      | Pro                  | Arg                |
| 4368527                 | <i>Btnl5</i>   | G                     | A                      | Glu                  | Lys                |
| 4368528                 | <i>Btnl5</i>   | A                     | T                      | Glu                  | Val                |
| 4368540                 | <i>Btnl5</i>   | G                     | A                      | Gly                  | Glu                |
| 4368544                 | <i>Btnl5</i>   | A                     | G                      | Ile                  | Met                |
| 4368545                 | <i>Btnl5</i>   | C                     | T                      | His                  | Tyr                |
| 4824317                 | <i>Slc39a7</i> | G                     | C                      | Asp                  | His                |
| 4824834                 | <i>Slc39a7</i> | C                     | T                      | Thr                  | Met                |
| 5619004                 | <i>Smim29</i>  | G                     | C                      | His                  | Asp                |
| 7767505                 | <i>Cmtr1</i>   | T                     | C                      | Gln                  | Arg                |

**Supplementary Table S3.** Summary of nonsynonymous aminoacid changes resulting from the SHR-derived variants in BN.SHR20 (excluding the *Rt1* and olfactory receptor genes). The complete list of variants is provided in Supplementary Table S2. The genomic position of the variants is given in basepairs (bp) of the rat chromosome 20 (RNO20) according to NCBI *Rattus norvegicus* Annotation Release 108, *Rattus norvegicus* mRatBN7.2 (GCF\_015227675.2 assembly).
