# Supplementary material for: Nutrigenetic Interaction of Spontaneously Hypertensive Rat Chromosome 20 Segment and High-Sucrose Diet Sensitizes to Metabolic Syndrome
Source: MDPI journal article supplement (doi:10.3390/nu14163428), 2022-08-20
Supplement: s1 [file s1]

| Strain                  | SHR-derived segment |      |       | vs. BN    |                     |                  |             |                  |               |
|-------------------------|---------------------|------|-------|-----------|---------------------|------------------|-------------|------------------|---------------|
|                         | RNO4                | RNO8 | RNO20 | Adiposity | Glucose intolerance | Triacylglycerols | Cholesterol | Free fatty acids | References    |
| BN.SHR4                 |                     |      |       | ↑         | ↑                   | ↑                | –           | ↑                | [1]           |
| BN-Lx                   |                     |      |       | ↓         | ↑                   | ↑                | –           | ↑                | [1]           |
| BN.SHR20                |                     |      |       | ↑         | ↑                   | ↑                | ↑           | ↑                | current study |
| BN-Lx.SHR4.SHR20        |                     |      |       | ↓         | ↑                   | ↑                | –           | ↑                | [1]           |
|                         | BN-derived segment  |      |       | vs. SHR   |                     |                  |             |                  |               |
|                         | RNO4                | RNO8 | RNO20 | Adiposity | Glucose intolerance | Triacylglycerols | Cholesterol | Free fatty acids | References    |
| SHR.BN-RT1 <sup>N</sup> |                     |      |       | ↑         | ↑                   | –                | –           | –                | [2]           |
| SHR-Lx                  |                     |      |       | ↓         | ↓                   | ↑                | –           | –                | [3],[4]       |
| SHR.BN4                 |                     |      |       | ↓         | ↓                   | ↓                | –           | ↓                | [5]           |

**Supplementary Table S4.** Comparison of the metabolic effects of reciprocal introgression of genomic segments of chromosomes 4, 8, and 20 in congenic rat models.

1. Seda, O.; Sedova, L.; Kazdova, L.; Krenova, D.; Kren, V. Metabolic characterization of insulin resistance syndrome feature loci in three brown Norway-derived congenic strains. *Folia Biol (Praha)* **2002**, *48*, 81-88.
2. Pausova, Z.; Sedova, L.; Berube, J.; Hamet, P.; Tremblay, J.; Dumont, M.; Gaudet, D.; Pravenec, M.; Kren, V.; Kunes, J. Segment of rat chromosome 20 regulates diet-induced augmentations in adiposity, glucose intolerance, and blood pressure. *Hypertension* **2003**, *41*, 1047-1055, doi:10.1161/01.HYP.0000064347.49341.0B.
3. Seda, O. Comparative gene map of hypertriglyceridaemia. *Folia Biol (Praha)* **2004**, *50*, 43-57.
4. Seda, O.; Liska, F.; Sedova, L.; Kazdova, L.; Krenova, D.; Kren, V. A 14-gene region of rat chromosome 8 in SHR-derived polydactylous congenic substrain affects muscle-specific insulin resistance, dyslipidaemia and visceral adiposity. *Folia Biol (Praha)* **2005**, *51*, 53-61.
5. Pravenec, M.; Zidek, V.; Simakova, M.; Kren, V.; Krenova, D.; Horky, K.; Jachymova, M.; Mikova, B.; Kazdova, L.; Aitman, T.J., et al. Genetics of Cd36 and the clustering of multiple cardiovascular risk factors in spontaneous hypertension. *J Clin Invest* **1999**, *103*, 1651-1657, doi:10.1172/JCI6691.
